# Supplementary material for: Recent Outbreaks of Shigellosis in California Caused by Two Distinct Populations of Shigella sonnei with either Increased Virulence or Fluoroquinolone Resistance
Source: PubMed Central journal article supplement (PMC5177732; doi:10.1128/msphere.00344-16), 2016-12-21

# Figure S7. Cryptic STX-converting prophages found in CA *S. sonnei* genomes.

## C7 Region 10- Intact Stx2-converting phage 1717 (NC\_011357):

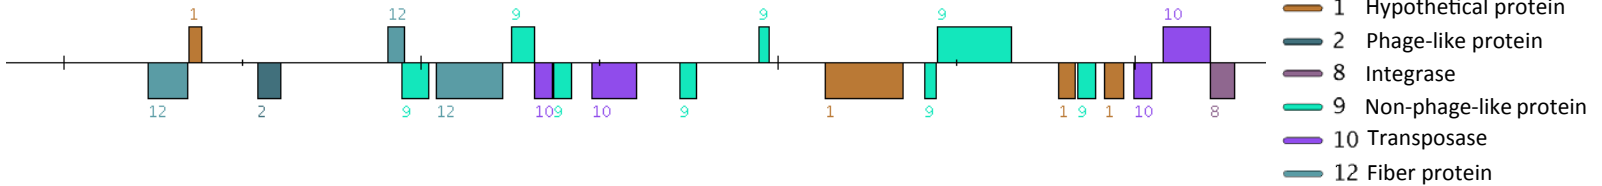

## C113 Region 14- Incomplete Stx2-converting phage 86 (NC\_008464):

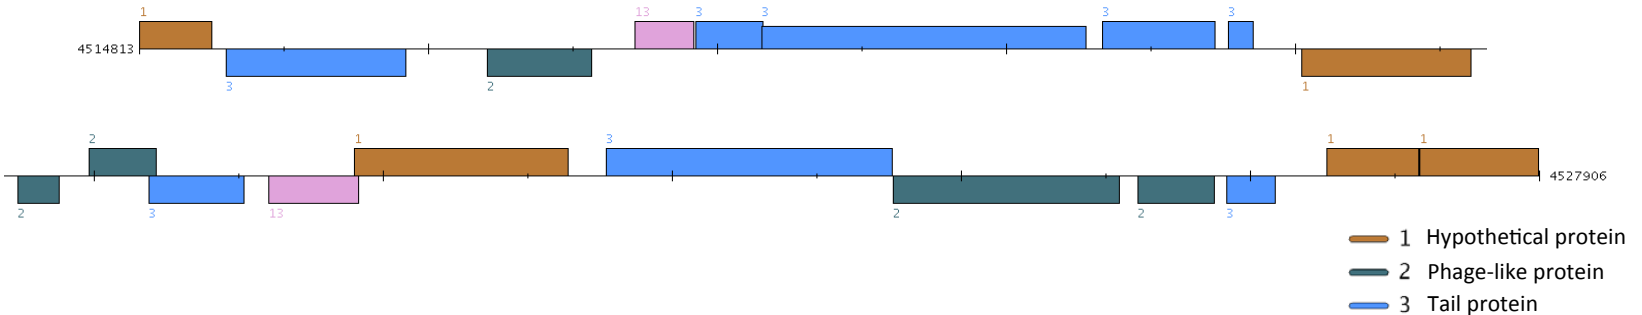

## C16-Region 15- questionable Stx2-converting phage I (NC\_003525):

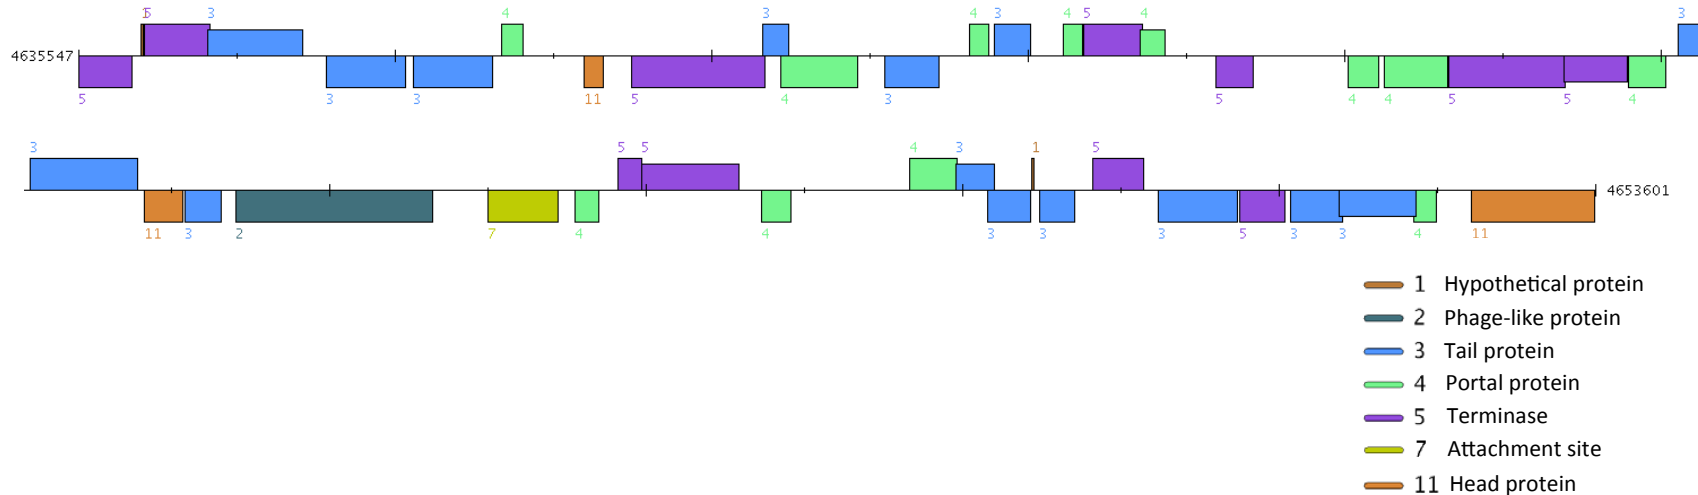

Supplement: sph006162211sf8.pdf [file sph006162211sf8.pdf]
